# Supplementary material
Source: PubMed Central journal article supplement (PMC3785072)
Supplement: NIHMS472318-supplement-Supplement.pdf [file NIHMS472318-supplement-Supplement.pdf]

**ONLINE SUPPLEMENT FOR**

**CARDIOVASCULAR OUTCOMES IN INDIVIDUALS WITH DIABETES FROM THE  
FRAMINGHAM STUDY: THE IMPORTANCE OF BLOOD PRESSURE**

Guanmin Chen  
Finlay A. McAlister  
Robin L Walker  
Brenda R Hemmelgarn  
Norm RC Campbell

**Table S-1:** The adjusted hazard ratio (HR) for hypertension as a risk factor for death or cardiovascular events and population attributable risk (PAR) in individuals over age 35 with diabetes: sensitivity analyses using measured BP  $\geq 140$  or  $\geq 90$  mmHg or current use of antihypertensive therapy to define hypertension)

| Outcomes                              | HR (95% CI,<br>Hypertension<br>vs.<br>Normotension) | Prevalence of<br>Hypertension | Population<br>Attributable<br>Risk (%) |
|---------------------------------------|-----------------------------------------------------|-------------------------------|----------------------------------------|
| All cause death                       |                                                     | 49.0                          |                                        |
| Model 1*                              | 1.44(1.38-1.50)                                     |                               | 16.4                                   |
| Model 2†                              | 1.62(1.52-1.71)                                     |                               | 21.6                                   |
| Model 3‡                              | 1.89(1.70-2.11)                                     |                               | 28.6                                   |
| CVD death                             |                                                     | 49.1                          |                                        |
| Model 1*                              | 2.27(2.10-2.45)                                     |                               | 36.3                                   |
| Model 2†                              | 2.54(2.29-2.82)                                     |                               | 40.9                                   |
| Model 3‡                              | 2.91(2.37-3.56)                                     |                               | 46.1                                   |
| MI                                    |                                                     | 49.0                          |                                        |
| Model 1*                              | 2.21(2.10-2.34)                                     |                               | 35.3                                   |
| Model 2†                              | 2.23(2.09-2.38)                                     |                               | 35.6                                   |
| Model 3‡                              | 2.30(2.12-2.50)                                     |                               | 36.9                                   |
| Stroke                                |                                                     | 49.0                          |                                        |
| Model 1*                              | 2.38(2.19-2.58)                                     |                               | 38.2                                   |
| Model 2†                              | 2.47(2.22-2.74)                                     |                               | 39.7                                   |
| Model 3‡                              | 2.39(2.03-2.80)                                     |                               | 38.3                                   |
| HF                                    |                                                     | 49.0                          |                                        |
| Model 1*                              | 2.54(2.29-2.83)                                     |                               | 40.9                                   |
| Model 2†                              | 2.50(2.16-2.88)                                     |                               | 40.2                                   |
| Model 3‡                              | 2.70(2.04-3.57)                                     |                               | 43.3                                   |
| Any one of MI,<br>Stroke, or HF event |                                                     | 49.0                          |                                        |
| Model 1*                              | 2.04(1.96-2.13)                                     |                               | 31.9                                   |
| Model 2†                              | 2.11(2.00-2.22)                                     |                               | 33.2                                   |
| Model 3‡                              | 2.02(1.90-2.15)                                     |                               | 31.4                                   |

Model 1\*: adjusted for sex and age

Model 2†: adjusted for sex, age, current smoker at baseline (yes, no), obesity (BMI $\geq 30$ ) at baseline, and hypercholesterolemia at baseline (>5.2mmol/L total cholesterol)

Model 3‡: adjusted for sex, age, current smoker at baseline (yes, no), obesity (BMI $\geq 30$ ) at baseline, hypercholesterolemia at baseline ( $\geq 5.2$ mmol/L total cholesterol), low HDL (<1.03mmol/L for male, <1.28mmol/L for female) at baseline

**Table S-2A:** The adjusted hazard ratio (HR) for blood pressure (continuous variable) as a risk factor for death or cardiovascular events among 1145 individuals with diabetes over age 35.

| Outcomes                           | Systolic blood pressure<br>HR per 10mmHg<br>(95%CI) | P value | Diastolic blood pressure<br>HR per 10mmHg<br>(95%CI) | P value |
|------------------------------------|-----------------------------------------------------|---------|------------------------------------------------------|---------|
| All cause death                    | 1.094(0.983-1.217)                                  | 0.099   | 1.168(0.995-1.429)                                   | 0.061   |
| CVD death                          | 1.168(1.062-1.284)                                  | 0.001   | 1.192(1.064-1.396)                                   | 0.004   |
| MI                                 | 1.170(1.069-1.281)                                  | 0.0006  | 1.176(1.041-1.328)                                   | 0.009   |
| Stroke                             | 1.202(1.096-1.319)                                  | 0.0001  | 1.192(0.999-1.421)                                   | 0.051   |
| HF                                 | 1.198(1.094-1.312)                                  | 0.0001  | 1.055(0.983-1.261)                                   | 0.052   |
| Any one of MI, Stroke, or HF event | 1.155(1.102-1.212)                                  | <.0001  | 1.133(1.011-1.269)                                   | 0.032   |

The model includes the variables of systolic blood pressures and diastolic blood pressure separately, and is adjusted for sex, age, current smoker at baseline (yes, no), obesity (BMI $\geq$ 30) at baseline, hypercholesterolemia at baseline ( $\geq$ 5.2mmol/L total cholesterol), and low HDL at baseline (<1.03mmol/L for male, <1.28mmol/L for female)

**Table S-2B:** The adjusted hazard ratio (HR) for mean arterial blood pressure and pulse blood pressure (continuous variable) as a risk factor for death or cardiovascular events among 1145 individuals with diabetes over age 35.

| Outcomes                           | Mean arterial blood pressure<br>HR per 10mmHg<br>(95% CI) | P value | Pulse blood pressure<br>HR per 10mmHg<br>(95% CI) | P value |
|------------------------------------|-----------------------------------------------------------|---------|---------------------------------------------------|---------|
| All cause death                    | 1.108(0.993-1.307)                                        | 0.055   | 1.131(0.997-1.238)                                | 0.056   |
| CVD death                          | 1.705(1.318-2.205)                                        | <.0001  | 1.698(1.356-2.127)                                | <.0001  |
| MI                                 | 1.242(1.081-1.428)                                        | 0.002   | 1.155(1.034-1.289)                                | <.0001  |
| Stroke                             | 1.216(1.054-1.403)                                        | 0.008   | 1.246(1.045-1.486)                                | 0.011   |
| HF                                 | 1.757(1.272-2.426)                                        | 0.0006  | 1.412(1.242-1.605)                                | 0.014   |
| Any one of MI, Stroke, or HF event | 1.195(1.089-1.311)                                        | 0.0002  | 1.217(1.134-1.307)                                | <.0001  |

The model includes the variable of systolic blood pressures and diastolic blood pressure separately, and is adjusted for sex, age, current smoker at baseline (yes, no), obesity (BMI $\geq$ 30) at baseline, hypercholesterolemia at baseline ( $\geq$ 5.2mmol/L total cholesterol), and low HDL at baseline (<1.03mmol/L for male, <1.28mmol/L for female)

**Table S-3:** The adjusted hazard ratio (HR) for hypertension and diabetes as independent risk factors for death or cardiovascular events in all individuals over age 35.

| Outcomes                                      | HR (95%CI,<br>Hypertension vs.<br>Normotension) | P value |
|-----------------------------------------------|-------------------------------------------------|---------|
| <b>All cause death</b>                        |                                                 |         |
| Hypertension                                  | 1.67(1.35-2.07)                                 | <.0001  |
| Diabetes                                      | 1.82(1.41-2.35)                                 | <.0001  |
| <b>CVD death</b>                              |                                                 |         |
| Hypertension                                  | 3.01(1.90-4.76)                                 | <.0001  |
| Diabetes                                      | 2.59(1.64-4.11)                                 | <.0001  |
| <b>MI</b>                                     |                                                 |         |
| Hypertension                                  | 2.00(1.66-2.41)                                 | <.0001  |
| Diabetes                                      | 2.62(2.11-3.25)                                 | <.0001  |
| <b>Stroke</b>                                 |                                                 |         |
| Hypertension                                  | 2.80(1.90-4.02)                                 | <.0001  |
| Diabetes                                      | 2.61(1.80-3.80)                                 | <.0001  |
| <b>HF</b>                                     |                                                 |         |
| Hypertension                                  | 2.24(1.66-3.03)                                 | <.0001  |
| Diabetes                                      | 3.10(2.34-4.11)                                 | <.0001  |
| <b>Any one of MI, Stroke,<br/>or HF event</b> |                                                 |         |
| Hypertension                                  | 2.00(1.74-2.30)                                 | <.0001  |
| Diabetes                                      | 2.40(2.06-2.79)                                 | <.0001  |

The model included the variables of hypertension(Yes, No) and Diabetes (yes, No), and adjusted for sex, age, current smoker at baseline (yes, no), obesity (BMI $\geq$ 30) at baseline, hypercholesterolemia at baseline ( $\geq$ 5.2mmol/L total cholesterol), and low HDL at baseline (<1.03mmol/L for male, <1.28mmol/L for female). All 6741 study subjects were included in these analyses.

**Table S-4** The adjusted hazard ratio (HR) for hypertension as a risk factor for death or cardiovascular events and population attributable risk (PAR) in individuals over age 35 with diabetes: sensitivity analyses after excluding 110 normotensive individuals at baseline who developed hypertension during follow-up

| Outcomes                                 | Diabetes patients(N=1035)                       |                               |                                     |
|------------------------------------------|-------------------------------------------------|-------------------------------|-------------------------------------|
|                                          | HR (95%CI,<br>Hypertension vs.<br>Normotension) | Prevalence of<br>Hypertension | Population Attributable Risk<br>(%) |
| All cause<br>death                       |                                                 | 60.7                          |                                     |
| Model 1 <sup>†</sup>                     | 1.47(1.13-1.79)                                 |                               | 22.5                                |
| Model 2 <sup>‡</sup>                     | 1.43(1.02-1.97)                                 |                               | 20.9                                |
| Model 3 <sup>‡</sup>                     | 2.27(1.03-5.01)                                 |                               | 44.4                                |
| CVD death                                |                                                 | 58.6                          |                                     |
| Model 1 <sup>†</sup>                     | 2.06(1.42-3.00)                                 |                               | 38.9                                |
| Model 2 <sup>‡</sup>                     | 2.11(1.26-3.55)                                 |                               | 40.1                                |
| Model 3 <sup>‡</sup>                     | 3.64(1.86-7.12)                                 |                               | 62.3                                |
| MI                                       |                                                 | 58.1                          |                                     |
| Model 1 <sup>†</sup>                     | 1.66(1.04-2.97)                                 |                               | 27.2                                |
| Model 2 <sup>‡</sup>                     | 3.25(1.18-8.94)                                 |                               | 56.6                                |
| Model 3 <sup>‡</sup>                     | 2.52(1.09-7.00)                                 |                               | 46.7                                |
| Stroke                                   |                                                 | 56.4                          |                                     |
| Model 1 <sup>†</sup>                     | 1.73(1.12-2.66)                                 |                               | 29.4                                |
| Model 2 <sup>‡</sup>                     | 2.03(1.20-3.43)                                 |                               | 37.1                                |
| Model 3 <sup>‡</sup>                     | 2.05(1.14-3.71)                                 |                               | 37.6                                |
| HF                                       |                                                 | 56.5                          |                                     |
| Model 1 <sup>†</sup>                     | 2.40(1.37-3.04)                                 |                               | 47.0                                |
| Model 2 <sup>‡</sup>                     | 2.59(1.55-4.30)                                 |                               | 50.2                                |
| Model 3 <sup>‡</sup>                     | 3.22(1.15-6.27)                                 |                               | 58.9                                |
| Any one of<br>MI, Stroke, or<br>HF event |                                                 | 60.7                          |                                     |
| Model 1 <sup>†</sup>                     | 1.71(1.22-2.40)                                 |                               | 29.6                                |
| Model 2 <sup>‡</sup>                     | 2.17(1.39-3.40)                                 |                               | 41.3                                |
| Model 3 <sup>‡</sup>                     | 2.15(1.34-3.44)                                 |                               | 40.8                                |

Model 1<sup>†</sup> adjusted for sex, and age group (ten years period from 35 to more than 75 years old),

Model 2<sup>‡</sup> adjusted for sex, age, current smoker at baseline (yes, no), obesity (BMI $\geq$ 30) at baseline, and hypercholesterolemia at baseline ( $>5.2$ mmol/L total cholesterol)

Model 3<sup>‡</sup> adjusted for sex, age, current smoker at baseline (yes, no), obesity (BMI $\geq$ 30) at baseline, hypercholesterolemia at baseline ( $\geq 5.2$ mmol/L total cholesterol), low HDL at baseline ( $<1.03$ mmol/L for male,  $<1.28$ mmol/L for female)

**Figure S-1** Age- and sex-adjusted Cumulative incidence of study outcomes among subjects with diabetes 35 years or older

All cause death



CVD related death



### MI events



### Stroke events



### HF events



### Any MI, Stroke, CHF events
